# Supplementary material for: Comparison of 3 Randomized Clinical Trials of Frontline Therapies for Malignant Pleural Mesothelioma
Source: PubMed Central journal article supplement (PMC8908075; doi:10.1001/jamanetworkopen.2022.1490), 2022-03-09
Supplement: jamanetwopen-e221490-s001.pdf [file jamanetwopen-e221490-s001.pdf]

## Supplementary Online Content

Meirson T, Pentimalli F, Cerza F, et al. Comparison of 3 randomized clinical trials of frontline therapies for malignant pleural mesothelioma. *JAMA Netw Open*. 2022;5(3):e221490. doi:10.1001/jamanetworkopen.2022.1490

**eTable.** Main Baseline Features of the Patients With MPM Enrolled in the 3 Frontline Phase 3 RCTs

**eFigure.** Example of SIFI Calculation From the Reconstructed CheckMate743

This supplementary material has been provided by the authors to give readers additional information about their work.

**eTable. Main Baseline Features of the Patients With MPM Enrolled in the 3 Frontline Phase 3 RCTs**

| Phase III RCT                                     | MPS <sup>‡</sup>                 |                                 | MAPS                                              |                                  | CheckMate 743                    |                                                                |
|---------------------------------------------------|----------------------------------|---------------------------------|---------------------------------------------------|----------------------------------|----------------------------------|----------------------------------------------------------------|
|                                                   | <i>Pemetrexed plus Cisplatin</i> | <i>Cisplatin</i>                | <i>Pemetrexed plus cisplatin plus bevacizumab</i> | <i>Pemetrexed plus cisplatin</i> | <i>Nivolumab plus ipilimumab</i> | <i>Chemotherapy (Pemetrexed plus cisplatin or carboplatin)</i> |
| <b>Sex</b>                                        |                                  |                                 |                                                   |                                  |                                  |                                                                |
| Males                                             | 184 (81.4%)                      | 181 (81.5%)                     | 168 (75%)                                         | 170 (76%)                        | 234 (77%)                        | 233 (77%)                                                      |
| Females                                           | 42 (18.6%)                       | 41 (18.5%)                      | 55 (25%)                                          | 55 (24%)                         | 69 (23%)                         | 69 (23%)                                                       |
| <b>Median Age (Range)</b>                         |                                  |                                 |                                                   |                                  |                                  |                                                                |
|                                                   | 61 (29–85)                       | 60 (19–84)                      | 65.7 (61.5–70.0)                                  | 65.6 (60.8–70.3)                 | 69 (65–75)                       | 69 (62–75)                                                     |
| <b>Performance status</b>                         |                                  |                                 |                                                   |                                  |                                  |                                                                |
| <i>Scale; number of patients, (%) of patients</i> |                                  |                                 |                                                   |                                  |                                  |                                                                |
|                                                   | Karnofsky ≥70<br>37 (16.4%)      | Karnofsky ≥70<br>31 (14.0%)     | ECOG 0–1<br>216 (97%)                             | ECOG 0–1<br>217 (96%)            | ECOG 0<br>114 (38%)              | ECOG 0<br>128 (42%)                                            |
|                                                   | Karnofsky 80<br>72 (31.9%)       | Karnofsky 80<br>66 (29.7%)      | ECOG 2<br>7 (3%)                                  | ECOG 2<br>8 (4%)                 | ECOG 1<br>189 (62%)              | ECOG 1<br>173 (57%)                                            |
|                                                   | Karnofsky 90/100<br>117 (51.8%)  | Karnofsky 90/100<br>125 (56.3%) |                                                   |                                  |                                  |                                                                |
| <b>Histology</b>                                  |                                  |                                 |                                                   |                                  |                                  |                                                                |
| Epithelioid                                       | 154 (68.1%)                      | 152 (68.5%)                     | 179 (80%)                                         | 182 (81%)                        | 229 (76%)                        | 227 (75%)                                                      |
| Sarcomatoid <sup>†</sup>                          | 18 (8.0%)                        | 25 (11.3%)                      | 44 (20%)                                          | 43 (19%)                         | 35 (12%)                         | 36 (12%)                                                       |
| Mixed <sup>‡</sup>                                | 37 (16.4%)                       | 36 (16.2%)                      |                                                   |                                  | 39 (13%)                         | 39 (13%)                                                       |
| Non-epithelioid                                   |                                  |                                 |                                                   |                                  | 74 (24%)                         | 75 (25%)                                                       |
| Unspecified                                       | 17 (7.5%)                        | 9 (4.1%)                        |                                                   |                                  |                                  |                                                                |
| <b>Stage</b>                                      |                                  |                                 |                                                   |                                  |                                  |                                                                |
| I                                                 | 16 (7.1%)                        | 14 (6.3%)                       | NA                                                | NA                               | 12 (4%)                          | 20 (7%)                                                        |
| II                                                | 35 (15.6%)                       | 33 (15.0%)                      | NA                                                | NA                               | 23 (8%)                          | 22 (7%)                                                        |
| III                                               | 73 (32.4%)                       | 68 (30.9%)                      | NA                                                | NA                               | 103 (34%)                        | 106 (35%)                                                      |
| IV                                                | 102 (45.1%)*                     | 107 (48.2%)*                    | NA                                                | NA                               | 160 (53%)                        | 149 (49%)                                                      |
| Not reported                                      |                                  |                                 |                                                   |                                  | 5 (2%)                           | 5 (2%)                                                         |

ECOG: Eastern Cooperative Oncology Group; NA: not available; RCT: randomized clinical trial.

†The 'sarcomatoid and mixed' classes are reported jointly in the MAPS Study.

‡The Mixed class includes also 'other' variants in the Checkmate 743 Study.

\*Includes patients with unspecified stage (one patient in pemetrexed/cisplatin arm and two patients in cisplatin arm).

‡For the MPS trial values from the intention to treat group are reported.

**eFigure.** Example of SIFI Calculation From the Reconstructed CheckMate743

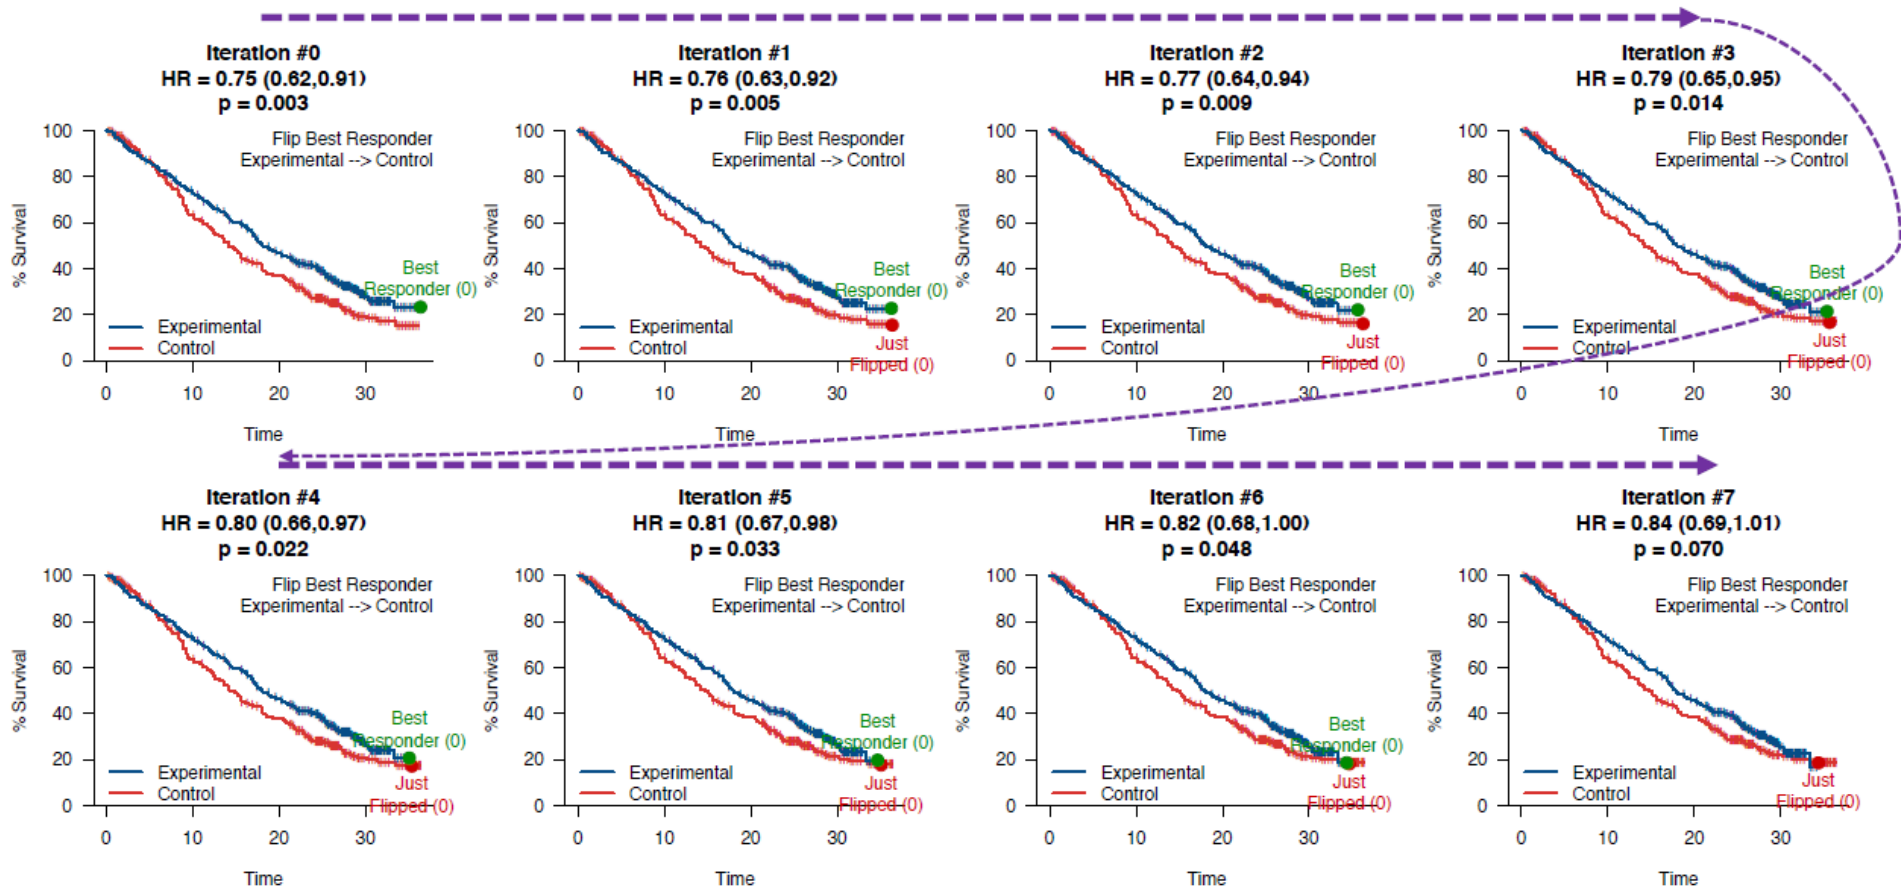

Shown are the iterations of the survival-inferred fragility index (SIFI) for overall survival in the intention-to-treat population of CheckMate 743. In this example the SIFI is 7 which is the iterative reassignment of the longest survivors (designated by circles at the end of the survival curves) from the experimental group to the control group, until positive significance is lost (defined as  $\alpha = .05$  using log-rank test). HR indicates hazard ratio.

Reconstructed survival curve. B, Second iteration of the survival curve. C, Third iteration of the survival curve.
